# Supplementary material
Source: MDPI journal article supplement (https://www.mdpi.com/search?q=minerals-10-00623)
Supplement: s001 [file minerals-10-00623-s001.pdf]

Table S1. Tellurium minerals: Number of species-defining's elements ( $N$ ) chemical formula, and number of localities ( $NL$ ).

| $N$ | Mineral             | Chemical formula                                             | $NL$ | References |
|-----|---------------------|--------------------------------------------------------------|------|------------|
| 4   | Adanite             | $Pb_2(TeO_3)(SO_4)$                                          | 1    | 1          |
| 6   | Agaitite            | $Pb_3[Cu(TeO_5OH)](CO_3)(OH)$                                | 2    | 2          |
| 4   | Alburnite           | $Ag_8GeTe_2S_4$                                              | 1    | 3          |
| 4   | Aleksite            | $PbBi_2Te_2S_2$                                              | 28   | 4          |
| 2   | Altaite             | $PbTe$                                                       | 489  | 5          |
| 5   | Andychristyite      | $PbCu(TeO_5) \cdot H_2O$                                     | 1    | 6          |
| 3   | Andymcdonaldite     | $Fe_2TeO_6$                                                  | 1    | 7          |
| 5   | Backite             | $Pb_2AlTeO_6Cl$                                              | 1    | 8          |
| 6   | Bairdite            | $Pb_2Cu_4Te_2O_{10}(OH)_2(SO_4) \cdot H_2O$                  | 4    | 9          |
| 3   | Baksanite           | $Bi_6Te_2S_3$                                                | 4    | 10         |
| 3   | Balyakinite         | $Cu(TeO_3)$                                                  | 4    | 11         |
| 5   | Benleonardite       | $Ag_{15}CuSb_2S_7Te_4$                                       | 20   | 12         |
| 3   | Bezsmertnovite      | $Au_4CuTe$                                                   | 6    | 13         |
| 4   | Bilibinskite        | $PbAu_3Cu_2Te_2$                                             | 12   | 14         |
| 4   | Bodieite            | $Bi_2(TeO_3)_2(SO_4)$                                        | 4    | 15         |
| 3   | Borovskite          | $Pd_3SbTe_4$                                                 | 11   | 16         |
| 4   | Brumadoite          | $Cu_3(TeO_4)(OH)_4 \cdot 5HO$                                | 1    | 17         |
| 5   | Buckhornite         | $Pb_2AuBiTe_2S_3$                                            | 13   | 18         |
| 6   | Burckhardtite       | $Pb_2(Fe^{3+}Te^{6+})_{\Sigma 2}(AlSi_3O_8)O_6$              | 4    | 19         |
| 2   | Calaverite          | $AuTe_2$                                                     | 361  | 20         |
| 2   | Cameronite          | $Cu_5Cu_3Te_{10}$                                            | 1    | 21         |
| 3   | Carlfriesite        | $CaTe^{6+}(Te^{4+})_2O_8$                                    | 4    | 22         |
| 3   | Cervelleite         | $Ag_4TeS$                                                    | 42   | 23         |
| 4   | Cesbronite          | $Cu_3Te^{6+}O_4(OH)_4$                                       | 3    | 24         |
| 3   | Chekhovichite       | $Bi_2Te_4O_{11}$                                             | 5    | 25         |
| 4   | Chenguodaite        | $Ag_9FeTe_2S_4$                                              | 2    | 26         |
| 5   | Cheremnykhite       | $Pb_3Zn_3(TeO_6)(VO_4)_2$                                    | 1    | 27         |
| 4   | Chiluite            | $Bi_6Te_2Mo^{6+}_2O_{21}$                                    | 1    | 28         |
| 7   | Choloalite          | $Pb_3(Cu_2Sb)_{\Sigma 3}Te_6O_{18}Cl$                        | 7    | 29         |
| 5   | Chromschieffelinite | $Pb_{10}[Te_2O_8(OH)_3]_2(TeO_2(OH)_4)_2(CrO_4) \cdot 5H_2O$ | 1    | 30         |
| 3   | Cliffordite         | $UTe_3O_9$                                                   | 4    | 31         |
| 2   | Coloradoite         | $HgTe$                                                       | 169  | 32         |
| 4   | Cuzticite           | $Fe_2(TeO_6) \cdot 3H_2O$                                    | 2    | 33         |
| 3   | Dagenaisite         | $Zn_3(TeO_6)$                                                | 1    | 34         |
| 5   | Debattistiite       | $Ag_{18}HgAs_{12}S_{24}Te_4$                                 | 1    | 35         |
| 4   | Denningite          | $CaMnTe_4O_{10}$                                             | 2    | 36         |
| 5   | Dugganite           | $Pb_3Zn_3(TeO_6)(AsO_4)_2$                                   | 18   | 37         |
| 5   | Eckhardtite         | $CaCu(TeO_5) H_2O$                                           | 3    | 38         |

|   |                   |                                                                                                     |     |    |
|---|-------------------|-----------------------------------------------------------------------------------------------------|-----|----|
| 4 | Emmonsite         | $\text{Fe}_2(\text{TeO}_3)_3 \cdot 2\text{H}_2\text{O}$                                             | 34  | 39 |
| 2 | Empressite        | $\text{AgTe}$                                                                                       | 43  | 40 |
| 7 | Eurekadumpite     | $\text{Cu}_{16}(\text{TeO}_3)_2(\text{AsO}_4)_3\text{Cl}(\text{OH})_{18} \cdot 7\text{H}_2\text{O}$ | 5   | 41 |
| 5 | Eztlite           | $\text{Pb}_2\text{Fe}_3(\text{TeO}_3)_3(\text{SO}_4)\text{O}_2\text{Cl}$                            | 2   | 33 |
| 3 | Fairbankite       | $\text{Pb}(\text{TeO}_3)$                                                                           | 1   | 42 |
| 4 | Frankhawthorneite | $\text{Cu}_2(\text{TeO}_4)(\text{OH})_2$                                                            | 2   | 43 |
| 2 | Frohbergite       | $\text{FeTe}_2$                                                                                     | 40  | 44 |
| 6 | Fuettererite      | $\text{Pb}_3\text{Cu}_6(\text{TeO}_6)(\text{OH})_7\text{Cl}_5$                                      | 3   | 45 |
| 2 | Gaotaiite         | $\text{Ir}_3\text{Te}_8$                                                                            | 1   | 46 |
| 3 | Goldfieldite      | $\text{Cu}_{10}\text{Te}_4\text{S}_{13}$                                                            | 72  | 47 |
| 4 | Graemite          | $\text{Cu}(\text{TeO}_3) \cdot \text{H}_2\text{O}$                                                  | 6   | 48 |
| 6 | Hagstromite       | $\text{Pb}_8\text{Cu}(\text{TeO}_6)_2(\text{CO}_3)\text{Cl}_4$                                      |     | 49 |
| 2 | Hedleyite         | $\text{Bi}_7\text{Te}_3$                                                                            | 104 | 50 |
| 3 | Henryite          | $\text{Cu}_4\text{Ag}_3\text{Te}_4$                                                                 | 4   | 51 |
| 2 | Hessite           | $\text{Ag}_2\text{Te}$                                                                              | 804 | 52 |
| 4 | Hitachiite        | $\text{Pb}_5\text{Bi}_2\text{Te}_2\text{S}_6$                                                       | 1   | 53 |
| 3 | Honeaite          | $\text{Au}_3\text{TlTe}_2$                                                                          | 3   | 54 |
| 5 | Housleyite        | $\text{Pb}_6\text{CuTe}_4\text{O}_{18}(\text{OH})_2$                                                | 5   | 55 |
| 6 | Ilimneyite        | $\text{MgZn}_2\text{Mn}_2(\text{TeO}_3)_6 \cdot 9\text{H}_2\text{O}$                                | 1   | 56 |
| 3 | Ingodite          | $\text{Bi}_2\text{TeS}$                                                                             | 30  | 57 |
| 4 | Jensenite         | $\text{Cu}_3(\text{TeO}_6) \cdot 2\text{H}_2\text{O}$                                               | 3   | 58 |
| 6 | Juabite           | $\text{CaCu}_{10}(\text{TeO}_3)_4(\text{AsO}_4)_4(\text{OH})_2 \cdot 4\text{H}_2\text{O}$           | 6   | 59 |
| 2 | Kalgoorlieite     | $\text{As}_2\text{Te}_3$                                                                            | 2   | 60 |
| 3 | Kawazulite        | $\text{Bi}_2\text{Te}_2\text{Se}$                                                                   | 32  | 61 |
| 2 | Keithconnite      | $\text{Pd}_{20}\text{Te}_7$                                                                         | 40  | 62 |
| 7 | Keystoneite       | $\text{MgNi}_2\text{Fe}_2(\text{TeO}_3)_6 \cdot 9\text{H}_2\text{O}$                                | 4   | 63 |
| 5 | Khinite           | $\text{Cu}_3\text{Pb}(\text{TeO}_6)(\text{OH})_2$                                                   | 14  | 37 |
| 5 | Kinichilite       | $\text{MgMn}_2\text{Fe}_2(\text{TeO}_3)_6 \cdot 9\text{H}_2\text{O}$                                | 2   | 64 |
| 3 | Kitkaite          | $\text{NiTeSe}$                                                                                     | 1   | 65 |
| 3 | Kochkarite        | $\text{PbBi}_4\text{Te}_7$                                                                          | 5   | 66 |
| 3 | Kojonenite        | $\text{Pd}_{7-x}\text{SnTe}_2$                                                                      | 1   | 67 |
| 3 | Kolarite          | $\text{PbTeCl}_2$                                                                                   | 3   | 68 |
| 3 | Kostovite         | $\text{AuCuTe}_4$                                                                                   | 21  | 69 |
| 2 | Kotulskite        | $\text{PdTe}$                                                                                       | 116 | 70 |
| 3 | Krennerite        | $\text{Au}_3\text{AgTe}_8$                                                                          | 111 | 71 |
| 5 | Kuksite           | $\text{Pb}_3\text{Zn}_3(\text{TeO}_6)(\text{PO}_4)_2$                                               | 6   | 27 |
| 4 | Kuranakhite       | $\text{PbMn}(\text{TeO}_6)$                                                                         | 7   | 72 |
| 3 | Kurilite          | $\text{Ag}_8\text{Te}_3\text{Se}$                                                                   | 2   | 73 |
| 5 | Leisingite        | $\text{CuMg}_2(\text{TeO}_6) \cdot 6\text{H}_2\text{O}$                                             | 2   | 74 |
| 2 | Lingbaoite        | $\text{AgTe}_3$                                                                                     | 1   | 75 |
| 3 | Lukkulaisvaaraite | $\text{Pd}_{14}\text{Ag}_2\text{Te}_9$                                                              | 2   | 76 |

|   |                 |                                                                                                          |     |     |
|---|-----------------|----------------------------------------------------------------------------------------------------------|-----|-----|
| 4 | Mackayite       | $\text{Fe}(\text{Te}_2\text{O}_5)(\text{OH})$                                                            | 12  | 77  |
| 3 | Magnolite       | $\text{Hg}_2(\text{TeO}_3)$                                                                              | 3   | 78  |
| 3 | Maletoyvayamite | $\text{Au}_3\text{Se}_4\text{Te}_6$                                                                      | 1   | 79  |
| 4 | Markcooperite   | $\text{Pb}_2(\text{UO}_2)(\text{TeO}_6)$                                                                 | 2   | 80  |
| 3 | Maslovite       | $\text{PtBiTe}$                                                                                          | 23  | 81  |
| 2 | Mattagamite     | $\text{CoTe}_2$                                                                                          | 7   | 82  |
| 3 | Mayingite       | $\text{IrBiTe}$                                                                                          | 3   | 83  |
| 5 | Mazzettiite     | $\text{Ag}_3\text{HgPbSbTe}_5$                                                                           | 1   | 84  |
| 3 | Mcalpineite     | $\text{Cu}_3(\text{TeO}_6)$                                                                              | 12  | 85  |
| 2 | Melonite        | $\text{NiTe}_2$                                                                                          | 207 | 86  |
| 2 | Merenskyite     | $\text{PdTe}_2$                                                                                          | 155 | 87  |
| 5 | Metatamboite    | $\text{Fe}_3(\text{OH})(\text{SO}_4)(\text{TeO}_3)_3[\text{TeO}(\text{OH})_2] \cdot 3\text{H}_2\text{O}$ | 1   | 88  |
| 3 | Michenerite     | $\text{PdBiTe}$                                                                                          | 114 | 89  |
| 3 | Miessiite       | $\text{Pd}_{11}\text{Te}_2\text{Se}_2$                                                                   | 1   | 90  |
| 4 | Millsite        | $\text{Cu}(\text{TeO}_3) \cdot 2\text{H}_2\text{O}$                                                      | 1   | 91  |
| 2 | Mitrofanovite   | $\text{Pt}_3\text{Te}_4$                                                                                 | 1   | 92  |
| 4 | Moctezumite     | $\text{Pb}(\text{UO}_2)(\text{TeO}_3)_2$                                                                 | 1   | 93  |
| 5 | Mojaveite       | $\text{Cu}_6[\text{TeO}_4(\text{OH})_2](\text{OH})_7\text{Cl}$                                           | 9   | 94  |
| 2 | Moncheite       | $\text{PtTe}_2$                                                                                          | 133 | 70  |
| 3 | Monchetundraite | $\text{Pd}_2\text{NiTe}_2$                                                                               | 1   | 95  |
| 4 | Montanite       | $\text{Bi}_2(\text{TeO}_6) \cdot 2\text{H}_2\text{O}$                                                    | 22  | 96  |
| 2 | Montbrayite     | $\text{Au}_2\text{Te}_3$                                                                                 | 19  | 97  |
| 4 | Mroseite        | $\text{CaTeO}_2(\text{CO}_3)$                                                                            | 3   | 98  |
| 5 | Müllerite       | $\text{Pb}_2\text{Fe}(\text{TeO}_6)\text{Cl}$                                                            | 1   | 99  |
| 3 | Museumite       | $\text{Pb}_2\text{Pb}_2\text{S}_8\text{Te}_2$                                                            | 1   | 100 |
| 3 | Muthmannite     | $\text{AuAgTe}_2$                                                                                        | 7   | 101 |
| 6 | Nabokoite       | $\text{Cu}_7\text{TeO}_4(\text{SO}_4)_5 \cdot \text{KCl}$                                                | 1   | 102 |
| 4 | Northstarite    | $\text{Pb}_6(\text{TeO}_3)_5(\text{S}^{6+}\text{O}_3\text{S}^{2-})$                                      | 1   | 103 |
| 3 | Ognitite        | $\text{NiBiTe}$                                                                                          | 1   | 104 |
| 3 | Ottoite         | $\text{Pb}_2\text{TeO}_5$                                                                                | 5   | 105 |
| 5 | Oulankaite      | $\text{Pd}_5\text{Cu}_4\text{SnTe}_2\text{S}_2$                                                          | 3   | 106 |
| 3 | Pampaloite      | $\text{AuSbTe}$                                                                                          | 1   | 107 |
| 5 | Pararaisaite    | $\text{CuMg}[\text{TeO}_4(\text{OH})_2] \cdot 6\text{H}_2\text{O}$                                       | 1   | 108 |
| 2 | Paratellurite   | $\text{TeO}_2$                                                                                           | 20  | 109 |
| 5 | Paratimroseite  | $\text{Pb}_2\text{Cu}_4(\text{TeO}_6)_2 \cdot 2\text{H}_2\text{O}$                                       | 2   | 110 |
| 3 | Pašavaite       | $\text{Pd}_3\text{Pb}_2\text{Te}_2$                                                                      | 1   | 111 |
| 3 | Petzite         | $\text{Ag}_3\text{AuTe}_2$                                                                               | 409 | 112 |
| 2 | Pilsenite       | $\text{Bi}_4\text{Te}_3$                                                                                 | 57  | 113 |
| 3 | Pingguite       | $\text{Bi}_6\text{Te}_2\text{O}_{13}$                                                                    | 5   | 114 |
| 3 | Plumbotellurite | $\text{Pb}(\text{TeO}_3)$                                                                                | 3   | 115 |
| 5 | Poughite        | $\text{Fe}_2(\text{TeO}_3)_2(\text{SO}_4) \cdot 3\text{H}_2\text{O}$                                     | 12  | 116 |

|   |                      |                                                                                                                                       |     |     |
|---|----------------------|---------------------------------------------------------------------------------------------------------------------------------------|-----|-----|
| 5 | Quetzalcoatlite      | $\text{Cu}_4\text{Zn}_8(\text{TeO}_3)_3(\text{OH})_{18}$                                                                              | 6   | 117 |
| 4 | Radhakrishnaite      | $\text{PbTe}_3\text{Cl}_2$                                                                                                            | 2   | 68  |
| 5 | Raisaite             | $\text{CuMg}[\text{TeO}_4(\text{OH})_2] \cdot 6\text{H}_2\text{O}$                                                                    | 1   | 118 |
| 3 | Rajite               | $\text{CuTe}_2\text{O}_5$                                                                                                             | 2   | 119 |
| 2 | Rickardite           | $\text{Cu}_3\text{Te}_2$                                                                                                              | 52  | 120 |
| 5 | Rodalquilarite       | $\text{H}_3\text{Fe}_2(\text{Te}^{4+}\text{O}_3)_4\text{Cl}$                                                                          | 6   | 121 |
| 3 | Rucklidgeite         | $\text{PbBi}_2\text{Te}_4$                                                                                                            | 64  | 122 |
| 4 | Saddlebackite        | $\text{Pb}_2\text{Bi}_2\text{Te}_2\text{S}_3$                                                                                         | 3   | 123 |
| 5 | Schieffelinite       | $\text{Pb}_{10}\text{Te}_6\text{O}_{20}(\text{OH})_{14}(\text{SO}_4) \cdot 5\text{H}_2\text{O}$                                       | 4   | 124 |
| 3 | Schmitterite         | $(\text{UO}_2)(\text{TeO}_3)$                                                                                                         | 6   | 125 |
| 2 | Shuangfengite        | $\text{IrTe}_2$                                                                                                                       | 4   | 126 |
| 3 | Skippenite           | $\text{Bi}_2\text{Se}_2\text{Te}$                                                                                                     | 6   | 127 |
| 3 | Smirnite             | $\text{Bi}_2\text{TeO}_5$                                                                                                             | 7   | 128 |
| 4 | Sonoraite            | $\text{Fe}(\text{TeO}_3)(\text{OH}) \cdot \text{H}_2\text{O}$                                                                         | 11  | 129 |
| 3 | Sopcheite            | $\text{Ag}_4\text{Pd}_3\text{Te}_4$                                                                                                   | 24  | 130 |
| 2 | Spiridonovite        | $\text{Cu}_2\text{Te}$                                                                                                                | 1   | 131 |
| 3 | Spiroffite           | $\text{Mn}_2\text{Te}_3\text{O}_8$                                                                                                    | 4   | 132 |
| 2 | Stützite             | $\text{Ag}_5\text{Te}_3$                                                                                                              | 59  | 133 |
| 3 | Sulphotsumoite       | $\text{Bi}_3\text{Te}_2\text{S}$                                                                                                      | 13  | 134 |
| 3 | Sylvanite            | $\text{AgAuTe}_4$                                                                                                                     | 337 | 135 |
| 5 | Tamboite             | $\text{Fe}_3(\text{OH})(\text{SO}_4)(\text{Te}^{4+}\text{O}_3)_3[\text{Te}^{4+}\text{O}(\text{OH})_2] \cdot 5\text{H}_2\text{O}$      | 1   | 88  |
| 4 | Teineite             | $\text{Cu}(\text{TeO}_3) \cdot 2\text{H}_2\text{O}$                                                                                   | 14  | 136 |
| 2 | Telargpalite         | $\text{Pd}_3\text{Te}$                                                                                                                | 18  | 137 |
| 2 | Tellurantimony       | $\text{Sb}_2\text{Te}_3$                                                                                                              | 29  | 82  |
| 2 | Tellurite            | $\text{TeO}_2$                                                                                                                        | 52  | 138 |
| 1 | Tellurium            | $\text{Te}$                                                                                                                           | 190 | 139 |
| 2 | Tellurobismuthite    | $\text{Bi}_2\text{Te}_3$                                                                                                              | 276 | 140 |
| 4 | Tellurohauchecornite | $\text{Ni}_9\text{BiTeS}_8$                                                                                                           | 2   | 141 |
| 4 | Telluromandarinoite  | $\text{Fe}^{3+}_2(\text{Te}^{4+}\text{O}_3)_3 \cdot 6\text{H}_2\text{O}$                                                              | 1   | 142 |
| 3 | Telluronevskite      | $\text{Bi}_3\text{TeSe}_2$                                                                                                            | 3   | 143 |
| 2 | Telluropalladinite   | $\text{Pd}_9\text{Te}_4$                                                                                                              | 15  | 62  |
| 4 | Telluroperite        | $\text{Pb}_2(\text{TePb})_{\Sigma 2}\text{O}_4\text{Cl}_2$                                                                            | 4   | 144 |
| 3 | Temagamite           | $\text{Pd}_3\text{HgTe}_3$                                                                                                            | 24  | 145 |
| 3 | Tetradymite          | $\text{Bi}_2\text{Te}_2\text{S}$                                                                                                      | 510 | 146 |
| 4 | Tewite               | $\text{K}_4(\text{Te}_3\text{O}_{10})_{\Sigma 4}\text{W}_{10}\text{O}_{38}$                                                           | 1   | 147 |
| 6 | Thorneite            | $\text{Pb}_6(\text{Te}_2\text{O}_{10})(\text{CO}_3)\text{Cl}_2(\text{H}_2\text{O})$                                                   | 4   | 148 |
| 5 | Timroseite           | $\text{Pb}_2\text{Cu}_5(\text{TeO}_6)_2(\text{OH})_2$                                                                                 | 8   | 110 |
| 6 | Tlalocite            | $\text{Cu}_{10}\text{Zn}_6(\text{Te}^{4+}\text{O}_3)(\text{Te}^{6+}\text{O}_4)_2\text{Cl}(\text{OH})_{25} \cdot 27\text{H}_2\text{O}$ | 2   | 149 |
| 6 | Tlapallite           | $\text{H}_6\text{Ca}_2\text{Cu}_3\text{O}_2(\text{SO}_4)(\text{Te}^{4+}\text{O}_3)_4(\text{Te}^{6+}\text{O}_4)$                       | 5   | 150 |
| 3 | Törnroosite          | $\text{Pd}_{11}\text{As}_2\text{Te}_2$                                                                                                | 4   | 151 |
| 4 | Tsnigriite           | $\text{Ag}_9\text{SbTe}_3\text{S}_3$                                                                                                  | 4   | 152 |

|   |                 |                                                                                                                    |     |     |
|---|-----------------|--------------------------------------------------------------------------------------------------------------------|-----|-----|
| 2 | Tsumoite        | BiTe                                                                                                               | 100 | 153 |
| 5 | Utahite         | $\text{Cu}_5\text{Zn}_3(\text{TeO}_4)_4(\text{OH})_8 \cdot 7\text{H}_2\text{O}$                                    | 4   | 154 |
| 3 | Vavřinite       | $\text{Ni}_2\text{SbTe}_2$                                                                                         | 2   | 155 |
| 3 | Vihorlatite     | $\text{Bi}_{24}\text{Se}_{17}\text{Te}_4$                                                                          | 1   | 156 |
| 3 | Volynskite      | $\text{AgBiTe}_2$                                                                                                  | 64  | 157 |
| 2 | Vulcanite       | CuTe                                                                                                               | 11  | 158 |
| 3 | Walfordite      | $(\text{Fe}^{3+}_2\text{Te}^{6+})_{\Sigma 3}\text{Te}^{4+}_9\text{O}_{24}$                                         | 1   | 159 |
| 2 | Weissite        | $\text{Cu}_2\text{Te}$                                                                                             | 31  | 160 |
| 3 | Winstanleyite   | $\text{TiTe}_3\text{O}_8$                                                                                          | 2   | 42  |
| 5 | Xocolatlite     | $\text{Ca}_2\text{Mn}_2\text{Te}_2\text{O}_{12} \cdot \text{H}_2\text{O}$                                          | 2   | 161 |
| 4 | Xocomecatlite   | $\text{Cu}(\text{TeO}_4)(\text{OH})_4$                                                                             | 10  | 149 |
| 4 | Yafsoanite      | $\text{Ca}_3\text{Zn}_3(\text{TeO}_6)_2$                                                                           | 4   | 162 |
| 5 | Yecoraite       | $\text{Fe}_3\text{Bi}_5\text{O}_9(\text{Te}^{4+}\text{O}_3)(\text{Te}^{6+}\text{O}_4)_2 \cdot 9\text{H}_2\text{O}$ | 7   | 163 |
| 6 | Zemannite       | $\text{MgZn}_2\text{Fe}_2(\text{TeO}_3)_6 \cdot 9\text{H}_2\text{O}$                                               | 7   | 164 |
| 3 | Zincospiroffite | $\text{Zn}_2\text{Te}_3\text{O}_8$                                                                                 | 4   | 165 |

## References

- Kampf, A.R.; Housley, R.M.; Rossman, G.R.; Yang, H.; Downs, R.T. Adanite, IMA 2019-088. CNMNC Newsletter No. 53; *Mineralogical Magazine* **2020**, *84*, <https://doi.org/10.1180/mgm.2020.5>.
- Kampf, A.R.; Mills, S.J.; Housley, R.M.; Marty, J. Lead-tellurium oxysalts from Otto Mountain near Baker, California: IX. Agaite,  $\text{Pb}_3\text{Cu}^{2+}\text{Te}^{6+}\text{O}_5(\text{OH})_2(\text{CO}_3)$ , a new mineral with  $\text{CuO}_5\text{-TeO}_6$  polyhedral sheets. *American Mineralogist* **2013**, *98*, 512-517.
- Tămaş, C.G.; Grobety, B.; Bailly, L.; Bernhardt, H.-J.; Minuţ, A. Alburnite,  $\text{Ag}_8\text{GeTe}_2\text{S}_4$ , a new mineral species from the Roşia Montana Au-Ag epithermal deposit, Apuseni Mountains, Romania. *American Mineralogist*. **2014**, *99*, 57-64.
- Lipovetskii A.G.; Borodaev Y.S.; Zav'yalov E.N. Aleksite,  $\text{PbBi}_2\text{Te}_2\text{S}_2$ , a new mineral. *Zapiski Vsesoyuznogo Mineralogicheskogo Obshchestva* **1978**, *107*(3), 315-321 (In Russian).
- Haidinger, W. Zweite Klasse: Geogenide. XII. Ordnung. Metalle. II. Tellur. Altait. In *Handbuch der Bestimmenden Mineralogie*. Wien: Braumüller and Seidel **1845**, 556-559 (In German)).
- Kampf, A.R.; Cooper, M.A.; Mills, S.J.; Housley, R.M.; Rossman, G.R.. Lead-tellurium oxysalts from Otto Mountain near Baker, California, USA: XII. Andychristyite,  $\text{PbCu}^{2+}\text{Te}^{6+}\text{O}_5(\text{H}_2\text{O})$ , a new mineral with *hcp* stair-step layers. *Mineralogical Magazine* **2016**, *80*, 1055-1065.
- Coolbaugh, M.F.; McCormack, J.K.; Raudsepp, M.; Czech, E.; McMillan, R.; Kampf, A.R. Andymcdonaldite ( $\text{Fe}^{3+}_2\text{Te}^{6+}\text{O}_6$ ), a new ferric iron tellurate with inverse trirutile structure from the Detroit district, Juab County, Utah. *The Canadian Mineralogist* **2020**, *58*(1), 85-97.
- Tait, K.T.; Dicecco, V.; Ball, N.A.; Hawthorne, F.C.; Kampf, A.R. Backite,  $\text{Pb}_2\text{Al}(\text{TeO}_6)\text{Cl}$ , a new tellurate mineral from the Grand Central mine, Tombstone Hills, Cochise County, Arizona: description and crystal structure. *The Canadian Mineralogist* **2015**, *52*, 935-942.
- Kampf, A.R.; Mills, S.J.; Housley, R.M.; Rossman, G.R.; Marty, J.; Thorne, B. Lead-tellurium oxysalts from Otto Mountain near Baker, California: X. Bairdite,  $\text{Pb}_2\text{Cu}^{2+}_4\text{Te}^{6+}_2\text{O}_{10}(\text{OH})_2(\text{SO}_4)(\text{H}_2\text{O})$ , a new mineral with thick HCP layers. *American Mineralogist* **2013**, *98*, 1315-1321.
- 10 Pekov, I.V.; Zav'yalov, E.N.; Fedushchenko, S.V.; Shcherbachev, D.K.; Borodaev, Y.S.; Dorokhova, G.I. Baksanite  $\text{Bi}_6(\text{Te}_2\text{S}_3)$ , a new mineral species from Tyrnyauz (Northern Caucasus). *Doklady Rossiiskoi Akademii Nauk* **1996**, *347*(6), 787-791 [In Russian].
- Spiridonov E.M. Balyakinite,  $\text{CuTeO}_3$ , a new mineral from the oxidation zone. *Doklady Akademii Nauk SSSR* **1980**, *253*(6), 1448-1450 (In Russian).

12. Stanley, C.J.; Criddle, A.J.; Chisholm, J.E. Benleonardite, a new mineral from the Bambolla mine, Moctezuma, Sonora, Mexico. *Mineralogical Magazine* **1986**, *50*, 681-686.
13. Spiridonov E.M.; Chvileva T.N. Bezsmertnovite  $Au_4Cu(Te,Pb)$ ; a new mineral from the zone of oxidation of deposits of the Far East. *Doklady Akademii Nauk SSSR* **1979**, *249*(1), 185-189 (In Russian).
14. Spiridonov E.M.; Bezsmertnaya M.S.; Chivleva T N; Bezsmertny V.V. Bilibinskite,  $Au_3Cu_2PbTe_2$ , a new mineral of gold-telluride deposits. *Zapiski Vsesoyuznogo Mineralogicheskogo Obshchestva* **1978**, *107*(3), 310-315 (In Russian).
15. Kampf, A.R.; Housley, R.M.; Rossman, G.R.; Marty, J.; Chorazewicz, M. Bodieite,  $Bi^{3+}_2(Te^{4+}O_3)_2(SO_4)$ , a New Mineral from the Tintic District, Utah, and the Masonic District, California, USA. *The Canadian Mineralogist* **2018**, *56*, 1-10.
16. Yalovai, A.; Sidorov, A.; Rudashevskii, N.; Bud'ko, I. Borovskite,  $PdSbTe_4$ , a new mineral. *Zapiski Vsesoyuznogo Mineralogicheskogo Obshchestva* **1973**, *102*(4), 427-431 (In Russian).
17. Atencio, D.; Roberts, A.C.; Matioli, P.A.; Stirling, J.A.R.; Venance, K.E.; Doherty, W.; Stanley, C.J.; Rowe, R.; Carpenter, G.J.C.; Coutinho, J.M.V. Brumadoite, a new copper tellurate hydrate, from Brumado, Bahia, Brazil. *Mineralogical Magazine* **2008**, *72*, 1201-1205.
18. Francis, C.A., Criddle, A.J., Stanley, C.J., Lange, D.E., Shieh, S.H. and Francis, J.G. Buckhornite,  $AuPb_2BiTe_2S_3$ , a new mineral species from Boulder County, Colorado, and new data for aikinite, tetradymite and calaverite. *The Canadian Mineralogist* **1992**, *30*, 1039-1047.
19. Gaines R.V., Leavens P.B., Nelen J.A. Burckhardtite, a new silicate-tellurite from Mexico, *American Mineralogist* **1979**, *64*, 355-358
20. Genth F.A. Contributions to mineralogy - No. VII. Calaverite, a new mineral,  $AuTe_4$ , *The American Journal of Science and Arts* **1868**, *95*, 305-321.
21. Roberts, A.C.; Harris, D.C.; Criddle, A.J.; Pinch, W.W. Cameronite, a new copper-silver telluride from the Good Hope Mine, Vulcan, Colorado. *The Canadian Mineralogist* **1986**, *24*, 379-384
22. Williams S.A.; Gaines R.V. Carlfriesite,  $H_4Ca(TeO_3)_3$ , a new mineral from Moctezuma, Sonora, Mexico. *Mineralogical Magazine* **1975**, *40*, 127-130.
23. Criddle, A.J.; Chisholm, J.E.; Stanley, C.J. Cerveleite,  $Ag_4TeS$ , a new mineral from the Bambolla Mine, Mexico, and a description of a photo-chemical reaction involving cervelleite, acanthite and hessite. *European Journal of Mineralogy* **1989**, *1*, 371-380.
24. Williams, S.A. Cesbronite, a new copper tellurite from Moctezuma, Sonora. *Mineralogical Magazine* **1974**, *39*, 744-746
25. Spiridonov, E.M.; Petrova, I.V., Demina, L.A.; Dolgikh, V.I.; Antonyan, G.M. The new mineral chekhovichite ( $Bi_2Te_4O_{11}$ ). *Vestnik Moskovskogo Universiteta, Geologiya* **1987**, *42*, 71-75 (In Russian).
26. Gu, X.; Watanabe, M.; Xie, X.; Peng, S.; Nakamuta, Y.; Ohkawa, M.; Hoshino, K.; Ohsumi, K.; Shibata, Y. Chenguodaite ( $Ag_9FeTe_2S_4$ ): a new tellurosulfide mineral from the gold district of East Shandong Peninsula, China. *Chinese Science Bulletin* **2008**, *53*, 3567-3573.
27. Kim, A.A.; Zayakina, N.V.; Mahkotko, V.F. Kuksite  $Pb_3Zn_3Te^{6+}O_6(PO_4)_2$  and chermnykhite  $Pb_3Zn_3Te^{6+}O_6(VO_4)_2$ —new tellurates from the Kuranakh gold deposit (Central Aldan, southern Yakutia). *Zapiski Vsesoyuznogo Mineralogicheskogo Obshchestva* **1990**, *119*(5), 50-57 (In Russian).
28. Yong, X.; Li, D., Wang, G.; Deng, M.; Chen, N.; Wang, S.; A study of chiluite—a new mineral in Chilu, Fujian, China. *Acta Mineralogica Sinica* **1989**, *9*, 9-14.
29. Williams, S.A. Choloalite,  $CuPb(TeO_3)_2 \cdot H_2O$ , a new mineral. *Mineralogical Magazine* **1981**, *44*, 55-57.
30. Kampf, A.R.; Mills, S.J.; Housley, R.M.; Rumsey, M.S.; Spratt, J. Lead-tellurium oxysalts from Otto Mountain near Baker, California: VII. Chromschiefelinite,  $Pb_{10}Te_6O_{20}(OH)_{14}(CrO_4)(H_2O)_5$ , the chromate analog of schiefelinite. *American Mineralogist* **2012**, *97*, 212-219.
31. Gaines, R.V. Cliffordite, a new tellurite mineral from Moctezuma, Sonora, Mexico. *American Mineralogist* **1969**, *54*, 697-701.
32. Genth, F.A. On some tellurium and vanadium minerals. 3. Coloradoite, a new mineral. *Proceedings of the American Philosophical Society* **1878**, *17*, 113-123.
33. Williams, S.A. Cuztcite and eztlite, two new tellurium minerals from Moctezuma, Mexico. *Mineralogical Magazine* **1982**, *46*, 257-259.
34. Kampf, A.R.; Housley, R.M.; Marty, J. Dagenaisite, A New Zinc Tellurate From the Gold Chain Mine, Tintic, Utah, USA. *The Canadian Mineralogist* **2017**, *55*, 867-873.

35. Guastoni, A.; Bindi, L.; Nestola, F. Debattistiite,  $\text{Ag}_9\text{Hg}_{0.5}\text{As}_6\text{S}_{12}\text{Te}_2$ , a new Te-bearing sulfosalt from Lengenbach quarry, Binn valley, Switzerland: description and crystal structure. *Mineralogical Magazine* **2012**, *76*, 743-750.
36. Mandarino, J.A.; Williams S.J.; Mitchell R.S. Denningite, a new tellurite mineral from Moctezuma, Sonora, Mexico, *The Canadian Mineralogist* **1963**, *7*, 443-452.
37. Williams, S.A. Khinite, parakhinite, and dugganite, three new tellurates from Tombstone, Arizona. *American Mineralogist* **1978**, *63*, 1016-1019.
38. Kampf, A.R.; Mills, S.J.; Housley, R.M.; Rossman, G.R.; Marty, J.; Thorne, B. Lead-tellurium oxysalts from Otto Mountain near Baker, California: XI. Eckhardite,  $(\text{Ca,Pb})\text{Cu}^{2+}\text{Te}^{6+}\text{O}_5(\text{H}_2\text{O})$ , a new mineral with HCP stair-step layers. *American Mineralogist* **2013**, *98*, 1617-1623.
39. Hillebrand, W.F. Emmonsite, a ferric tellurite. *Proceedings of the Colorado Science Society* **1885**, *2*, 20-23
40. Bradley, W.M. Empressite, a new silver-tellurium mineral from Colorado. *American Journal of Science* **1914**, *38*, 163-165
41. Pekov, I.V.; Chukanov, N.V.; Zadov, A.E.; Roberts, A.C.; Jensen, M.C.; Zubkova, N.V.; Nikischer, A.J. Eurekaumpite,  $(\text{Cu,Zn})_{16}(\text{TeO}_3)_2(\text{AsO}_4)_3\text{Cl}(\text{OH})_{18}\cdot 7\text{H}_2\text{O}$ , a new supergene mineral species. *Zapiski Rossiiskogo Mineralogicheskogo Obshchestva* **2010**, *139*(4), 26-35 (In Russian).
42. Williams, S.A. Girdite, oboyerite, fairbankite, and winstanleyite, four new tellurium minerals from Tombstone, Arizona. *Mineralogical Magazine* **1979**, *43*, 453-457.
43. Roberts A.C.; Grice J.D.; Criddle A.J.; Jensen M.C.; Harris D.C.; Moffatt E.A. Frankhawthorneite,  $\text{Cu}_2\text{Te}^{6+}\text{O}_4(\text{OH})_2$ , a new mineral species from the Centennial Eureka Mine, Tintic District, Juab County, Utah. *The Canadian Mineralogist* **1995**, *33*, 641-647.
44. Thompson, R.M. Frobergite,  $\text{FeTe}_2$ : A new member of the marcasite group. *University of Toronto Studies, VI. Geological Series* **1947**, *51*, 35-40.
45. Kampf, A.R.; Mills, S.J.; Housley, R.M.; Marty, J. Lead-tellurium oxysalts from Otto Mountain near Baker, California: VIII. Fuettererite,  $\text{Pb}_3\text{Cu}^{2+}_6\text{Te}^{6+}\text{O}_6(\text{OH})_7\text{Cl}_5$ , a new mineral with double spangolite-type sheets. *American Mineralogist* **2013**, *98*, 506-511.
46. Zuxiang, Y. Gaotaiite - a new iridium telluride. *Acta Mineralogica Sinica* **1995**, *15*, 1-4.
47. Ransome, F.L. The geology and ore deposits of Goldfield, Nevada, U.S. *Geological Survey Professional Paper* **1909**, *66*, 165-167
48. Williams, S.A.; Matter III, P. Graemite, a new Bisbee mineral. *Mineralogical Record* **1975**, *6*, 32-34.
49. Kampf, A.R.; Housley, R.M.; Mills, S.J.; Rossman, G.R.; Marty, J. Hagstromite, IMA 2019-093. CNMNC Newsletter No. 53; *Mineralogical Magazine* **2020**, *84*, doi: 10.1180/mgm.2020.5.
50. Warren, H.V.; Peacock, M.A. Hedleyite, a new bismuth telluride from British Columbia, with notes on wehrlite and some bismuth-tellurium alloys, University of Toronto Studies: VI. Geological Series **1945**, *49*, 55-69
51. Criddle, A.J.; Stanley, C.J.; Chisholm, J.E.; Fejer, E.E. Henryite, a new copper-silver telluride from Bisbee, Arizona. *Bulletin de minéralogie* **1983**, *106*, 511-517.
52. Fröbel, J. 4. Zunft: Monotrimetrische Pyritoïden. 1. Familie: Pyrrhotinen. Hessit, in *Grundzüge eines Systemes der Krystallogie oder der Naturgeschichte der Unorganischen Individuen*. Zürich und Winterthur: Druck und Verlag des Literarischen Comptoirs **1843**, 48-50 (In German).
53. Kuribayashi, T.; Nagase, T.; Nozaki, T.; Ishibashi, J.; Shimada, K.; Shimizu, M.; Momma, K. Hitachiite,  $\text{Pb}_5\text{Bi}_2\text{Te}_2\text{S}_6$ , a new mineral from the Hitachi mine, Ibaraki Prefecture, Japan. *Mineralogical Magazine* **2019**, *83*, 733-739.
54. Rice, C.M.; Welch, M.D.; Still, J.W.; Criddle, A.J.; Stanley, C.J. Honeaite, a new gold-thallium-telluride from the Eastern Goldfields, Yilgarn Craton, Western Australia. *European Journal of Mineralogy* **2016**, *28*, 979-990.
55. Kampf, A.R.; Marty, J.; Thorne, B. Lead-tellurium oxysalts from Otto Mountain near Baker, California: II. Housleyite,  $\text{Pb}_6\text{CuTe}_4\text{O}_{18}(\text{OH})_2$ , a new mineral with Cu-Te octahedral sheets. *American Mineralogist* **2010**, *95*, 1337-1342.
56. Pekov, I.V.; Siidra, O.I.; Vlasov, E.A.; Yapaskurt, V.O., Polekhovskiy, Y.S.; Apletalin, A.V. Ilirneyite,  $\text{Mg}_{0.5}[\text{ZnMn}^{3+}(\text{TeO}_3)_3]\cdot 4.5\text{H}_2\text{O}$ , a New Mineral from Chukotka, Russia. *The Canadian Mineralogist* **2018**, *56*, 913-921.
57. Zav'yalov, E.N.; Begizov, V.D. New bismuth mineral ingodite  $\text{Bi}_2\text{TeS}$ . *Zapiski Vsesoyuznogo Mineralogicheskogo Obshchestva* **1981**, *110*(5), 594-600 (In Russian).

- 
58. Roberts, A.C.; Grice, J.D.; Groat, L.A.; Criddle, A.J.; Gault, R.A., Erd, R.C.; Moffatt, E.A. Jensenite,  $\text{Cu}_3\text{Te}^{6+}\text{O}_6 \cdot 2\text{H}_2\text{O}$ , a new mineral species from the Centennial Eureka Mine, Tintic District, Juab County, Utah. *The Canadian Mineralogist* **1996**, *34*, 49-54.
59. Roberts A.C.; Gault R.A.; Jensen M.C.; Criddle A.J.; Moffatt E.A. Juabite,  $\text{Cu}_5(\text{Te}^{6+}\text{O}_4)_2(\text{As}^{5+}\text{O}_4)_2 \cdot 3\text{H}_2\text{O}$ , a new mineral species from the Centennial Eureka mine, Juab County, Utah. *Mineralogical Magazine* **1997**, *61*, 139-144
60. Rempel, K.; Stanley, C.J. Kalgoorlieite, IMA 2015-119. CNMNC Newsletter No. 30, April 2016, page 412; *Mineralogical Magazine* **2016**, *80*, 407-413.
61. Kato, A. Kawazulite,  $\text{Bi}_2\text{Te}_2\text{S}$ . *Introduction to Japanese Minerals* **1970**, 87-88.
62. Cabri, L.J.; Rowland, J.F.; Laflamme, J.H.G.; Stewart, J.M. Keithconnite, telluropalladinite and other Pd-Pt tellurides from the Stillwater Complex, Montana. *The Canadian Mineralogist* **1979**, *17*, 589-594.
63. Back, M.E.; Roberts, A.C.; LePage, Y.; Mandarino, J.A. Keystoneite, a new tellurite from the Keystone mine, Colorado, U.S.A. *Abstracts of the Joint Meeting Geological and Mineralogical Association of Canada* **1988**, *13*, A4.
64. Hori, H.; Koyama, E.; Nagashima, K. Kinichilite, a new mineral from the Kawazu mine, Shimoda city, Japan. *Mineralogical Journal* **1981**, *10*, 333-337.
65. Häkli, T.A.; Vuorelainen, Y.; Sahama, T.G. Kitkaite ( $\text{NiTeSe}$ ), a new mineral from Kuusamo, northeast Finland. *American Mineralogist* **1965**, *50*, 581-586.
66. Spiridonov, E.M.; Ershova, N.; Tananaeva, O. Kochkarite  $\text{PbBi}_4\text{Te}_7$ —A new mineral from contact metamorphosed ores. *Geologiya Rudnykh Mestorozhdenii* **1989**, *31*(4), 98-102 (In Russian).
67. Stanley, C.J.; Vymazalová, A. Kojonenite, a new palladium tin telluride mineral from the Stillwater Layered Igneous Intrusion, Montana, USA. *American Mineralogist* **2015**, *100*, 447-450.
68. Genkin, A.D.; Safonov, Y.G.; Vasudev, V.; Krishna Rao, B.; Boronikhin, V.A.; Vyalsov, L.N.; Gorshkov, A.I.; Mokhov, A.V. Kolarite,  $\text{PbTeCl}_2$ , and radhakrishnaite,  $\text{PbTe}_3(\text{Cl},\text{S})_2$ , new mineral species from the Kolar gold deposit, India. *The Canadian Mineralogist* **1985**, *23*, 501-506.
69. Terziev, G. Kostovite, a gold-copper telluride from Bulgaria. *American Mineralogist* **1966**, *51*, 29-36.
70. Genkin, A.D.; Zhuravlev, N.N.; Smirnova, E.M. Moncheite and kotulskite, new minerals; and the composition of michenerite. *Zapiski Vsesoyuznogo Mineralogicheskogo Obshchestva* **1963**, *92*(1), 33-50 (In Russian).
71. vom Rath, G. Ueber eine neue krystallisirte Tellurgold-Verbindung, den Bunsenin Krenner's. *Zeitschrift für Krystallographie und Mineralogie* **1877**, *1*, 614-617 (In German).
72. Yablokova, S.; Dubakina, L.; Dmitrik, A.; Sokolova, G. Kuranakhite—a new supergene tellurium mineral. *Zapiski Vsesoyuznogo Mineralogicheskogo Obshchestva* **1975**, *104*, 310-313 (In Russian)
73. Kovalenker, V.A.; Plotinskaya, O.Y.; Stanley, C.J.; Roberts, A.C.; McDonald, A.M.; Cooper, M.A. Kurilite,  $\text{Ag}_8\text{Te}_3\text{Se}$ , a new mineral from the Prasolovskoe deposit, Kuril islands, Russian Federation. *Mineralogical Magazine* **2010**, *74*, 463-468.
74. Roberts, A.C.; Groat, L.A.; Grice, J.D.; Gault, R.A.; Jensen, M.C.; Moffatt, E.A.; Stirling, J.A. Leisingite,  $\text{Cu}(\text{Mg},\text{Cu},\text{Fe},\text{Zn})_2\text{Te}^{6+}\text{O}_6 \cdot 6\text{H}_2\text{O}$ , a new mineral species from the Centennial Eureka mine, Juab County, Utah. *Mineralogical Magazine* **1996**, *60*, 653-658.
75. Jian, W.; Mao, J.; Lehmann, B.; Li, Y.; Ye, H.; Cai, J.; Li, Z. Lingbaoite, IMA 2018-138. CNMNC Newsletter No. 50; *Mineralogical Magazine* **2019**, *83*, DOI: [10.1180/mgm.2019.46](https://doi.org/10.1180/mgm.2019.46).
76. Vymazalová, A.; Grokhovskaya, T.L.; Laufek, F.; Rassulov, V.A. Lukkulaisvaaraite,  $\text{Pd}_{14}\text{Ag}_2\text{Te}_9$ , a new mineral from Lukkulaisvaara intrusion, northern Russian Karelia, Russia. *Mineralogical Magazine* **2014**, *78*, 1743-1754.
77. Frondel, C.; Pough, F.H. Two new tellurites of iron: mackayite and blakeite, with new data on emmonsite and "durdenite". *American Mineralogist* **1944**, *29*, 211-225.
78. Genth F.A. On some tellurium and vanadium minerals. 6. Magnolite, a new mineral. *Proceedings of the American Philosophical Society* **1878**, *17*, 113-123
79. Tolstyykh, N.D.; Tuhý, M.; Vymazalová, A.; Plášil, J.; Laufek, F.; Kasatkin, A.V.; Nestola, F. Maletoyvayamite, IMA 2019-021. CNMNC Newsletter No. 50; *Mineralogical Magazine* **2019**, *83*, doi: [10.1180/mgm.2019.46](https://doi.org/10.1180/mgm.2019.46).
80. Kampf, A.R.; Mills, S.J.; Housley, R.M.; Marty, J.; Thorne, B. Lead-tellurium oxysalts from Otto Mountain near Baker, California: IV. Markcooperite,  $\text{Pb}(\text{UO}_2)\text{Te}^{6+}\text{O}_6$ , the first natural uranyl tellurate. *American Mineralogist* **2010**, *95*, 1554-1559.



81. Kovalenker, V.A.; Begizov, V.D.; Evstigneeva, T.L.; Troneva, N.V.; Ryabikin, V.A. Maslovite, PtBiTe: a new mineral from the October copper-nickel deposit. *Geologiya Rudnykh Mestorozhdenii* **1979**, *21*, 94-104 (In Russian).
82. Thorpe, R.I.; Harris, D.C. Mattagamite and tellurantimony, two new telluride minerals from Mattagami Lake mine, Matagami area, Quebec. *The Canadian Mineralogist* **1973**, *12*, 55-60.
83. Zuxiang, Y. Mayingite - a new iridium bismuthide - telluride. *Acta Mineralogica Sinica* **1995**, *15*, 5-8.
84. Bindi, L.; Cipriani, C. Mazzettiite, Ag<sub>3</sub>HgPbSbTe<sub>5</sub>, a new mineral species from Findley Gulch, Saguache County, Colorado, USA. *The Canadian Mineralogist* **2004**, *42*, 1739-1743.
85. Roberts, A.C.; Ercit, T.S.; Criddle, A.J.; Jones, G.C.; Williams, R.S.; Cureton, F.F.II; Jensen, M.C. McAlpineite, Cu<sub>3</sub>TeO<sub>6</sub>·H<sub>2</sub>O, a new mineral from the McAlpine mine, Tuolumne County, California, and from the Centennial Eureka mine, Juab County, Utah. *Mineralogical Magazine* **1994**, *58*, 417-424
86. Genth, F.A. Contributions to mineralogy - No. VII. *The American Journal of Science and Arts* **1868**, *95*, 305-321.
87. Kingston, G.A. The occurrence of platinoid bismuthotellurides in the Merensky Reef at Rustenburg platinum mine in the western Bushveld. *Mineralogical Magazine* **1966**, *35*, 815-834.
88. Cooper, M.A.; Hawthorne, F.C.; Abdu, Y.A.; Walford, P.C.; Back, M.E. Relative Humidity As a Driver of Structural Change in Three New Ferric-sulfate-tellurite Hydrates: New Minerals Tamboite and Metatamboite, and a Lower-hydrate Derivative, Possibly Involving Direct Uptake of Atmospheric {H<sub>2</sub>O}<sub>4</sub> Clusters. *The Canadian Mineralogist* **2019**, *57*, 605-635.
89. Hawley, J.E.; Berry, L.G. Michenerite and froodite, palladium bismuthide minerals. *The Canadian Mineralogist* **1958**, *6*, 200-209.
90. Kojonen, K.K.; Tarkian, M.; Roberts, A.C.; Törnroos, R.; Heidrich, S. Miessiite, Pd<sub>11</sub>Te<sub>2</sub>Se<sub>2</sub>, a new mineral species from Miessijoki, Finnish Lapland, Finland. *The Canadian Mineralogist* **2007**, *45*, 1221-1227.
91. Rumsey, M.S.; Welch, M.D.; Mo, F.; Kleppe, A.K.; Spratt, J.; Kampf, A.R.; Raanes, M.P. Millsite CuTeO<sub>3</sub>·2H<sub>2</sub>O: a new polymorph of teineite from Gråurd fjellet, Oppdal kommune, Norway. *Mineralogical Magazine* **2018**, *82*, 433-444.
92. Subbotin, V.V.; Vymazalová, A.; Laufek, F.; Savchenko, Y.E.; Stanley, C.J.; Gabov, D.A.; Plášil, J. Mitrofanovite, Pt<sub>3</sub>Te<sub>4</sub>, a new mineral from the East Chuarvy deposit, Fedorovo-Pana intrusion, Kola Peninsula, Russia. *Mineralogical Magazine* **2019**, *83*, 523-530.
93. Gaines, R.V. Moctezumite, a new lead uranyl tellurite. *American Mineralogist* **1965**, *50*, 1158-1163.
94. Mills, S.J.; Kampf, A.R.; Christy, A.G.; Housley, R.M.; Rossman, G.R.; Reynolds, R.E.; Marty, J. Bluebellite and mojaveite, two new minerals from the central Mojave Desert, California, USA. *Mineralogical Magazine* **2014**, *78*, 1325-1340.
95. Vymazalová, A.; Laufek, F.; Grokhovskaya, T.L.; Stanley, C.J. Monchetundraite, IMA 2019-020. CNMNC Newsletter No. 50; *Mineralogical Magazine* **2019**, *83*, doi: 10.1180/mgm.2019.46.
96. Genth, F.A. Contributions to mineralogy - No. VII. *The American Journal of Science and Arts* **1868**, *95*, 305-321.
97. Peacock, M.A.; Thompson, R.M. Montbrayite, a new gold telluride. *American Mineralogist* **1946**, *31*, 515-526.
98. Mandarino, J.A.; Mitchell, R.S.; Hancock, R.G.V. Mroseite, a calcium tellurite-carbonate from Moctezuma, Sonora, Mexico. *The Canadian Mineralogist* **1975**, *13*, 286-288.
99. Mills, S.J.; Kampf, A.R.; Momma, K.; Housley, R.M.; Marty, J. Müllerite, IMA 2019-060. CNMNC Newsletter No. 52; *Mineralogical Magazine* **2019**, *83*, doi: 10.1180/mgm.2019.73.
100. Bindi, L.; Cipriani, C. Museumite, Pb<sub>5</sub>AuSbTe<sub>2</sub>Si<sub>2</sub>, a new mineral from the gold-telluride deposit of Sacarimb, Metaliferi Mountains, western Romania. *European Journal of Mineralogy* **2004**, *16*, 835-838.
101. Zambonini, F. Über den Muthmannit, ein neues mineral. *Zeitschrift für Kristallographie* **1911**, *49*, 246-249 (In German).
102. Popova, V.I.; Popov, V.A.; Rudashevskiy, N.S.; Glavatskikh, S.F.; Polyakov, V.O.; Bushmakina, A.F. Nabokoite Cu<sub>7</sub>TeO<sub>4</sub>(SO<sub>4</sub>)<sub>5</sub>·KCl and atlasovite Cu<sub>6</sub>Fe<sup>3+</sup>Bi<sup>3+</sup>O<sub>4</sub>(SO<sub>4</sub>)<sub>5</sub>·KCl. New minerals of volcanic exhalations. *Zapiski Vsesoyuznogo Mineralogicheskogo Obshchestva* **1987**, *116*(3), 358-367 (In Russian).
103. Kampf, A.R.; Housley, R.M.; Rossman, G.R. Northstarite, IMA 2019-031. CNMNC Newsletter No. 51; *Mineralogical Magazine* **2019**, *83*, doi: 10.1180/mgm.2019.58.

- 
104. Barkov, A.Y.; Bindi, L.; Tamura, N.; Shvedov, G.I.; Winkler, B.; Stan, C.V.; Morgenroth, W.; Martin, R.F.; Zaccarini, F.; Stanley, C.J. Ognitite, NiBiTe, a new mineral species, and Co-rich maucherite from the Ognit ultramafic complex, Eastern Sayans, Russia. *Mineralogical Magazine* **2019**, *83*(5), 695-703.
  105. Kampf, A.R.; Housley, R.M.; Mills, S.J.; Marty, J.; Thorne, B. Lead-tellurium oxysalts from Otto Mountain near Baker, California: I. Ottoite, Pb<sub>2</sub>TeO<sub>5</sub>, a new mineral with chains of tellurate octahedra. *American Mineralogist* **2010**, *95*, 1329-1336.
  106. Barkov, A.Y.; Men'Shikov, Y.P.; Begizov, V.D.; Lednev, A.I. Oulankaite, a new platinum-group mineral from the Lukkulaisvaara layered intrusion, northern Karelia, Russia. *European Journal of Mineralogy* **1996**, *8*, 311-316.
  107. Vymazalová, A.; Kojonen, K.; Laufek, F.; Johanson, B.; Stanley, C.J.; Plášil, J.; Halodová, P. Pampaloite, AuSbTe, a new mineral from Pampalo gold mine, Finland. *Mineralogical Magazine* **2019**, *83*, 393-400.
  108. Kampf, A.R., Housley, R.M.; Rossman, G.R. Paraisaite, the Dimorph of Raisaite, from the North Star Mine, Tintic, Utah, USA. *The Canadian Mineralogist* **2018**, *56*, 811-820.
  109. Switzer, G.; Swanson, H.E. Paratellurite, a new mineral from Mexico. *American Mineralogist* **1960**, *45*, 172-174.
  110. Kampf, A.R.; Mills, S.J.; Housley, R.M.; Marty, J.; Thorne, B. Lead-tellurium oxysalts from Otto Mountain near Baker, California: V. Timroseite, Pb<sub>2</sub>Cu<sup>2+</sup><sub>5</sub>(Te<sup>6+</sup>O<sub>6</sub>)<sub>2</sub>(OH)<sub>2</sub>, and paratimroseite, Pb<sub>2</sub>Cu<sup>2+</sup><sub>4</sub>(Te<sup>6+</sup>O<sub>6</sub>)<sub>2</sub>(H<sub>2</sub>O)<sub>2</sub>, two new tellurates with Te-Cu polyhedral sheets. *American Mineralogist* **2010**, *95*, 1560-1568.
  111. Vymazalová, A.; Laufek, F.; Drábek, M.; Haloda, J.; Sidorinová, T. Pašavaite, Pd<sub>3</sub>Pb<sub>2</sub>Te<sub>2</sub>, a new platinum-group mineral species from the Noril'sk-Talnakh Ni-Cu Camp, Russia. *The Canadian Mineralogist* **2009**, *47*, 53-62
  112. Haidinger, W. Zweite Klasse: Geogenide. XII. Ordnung. Metalle. II. Tellur. Petzit. In *Handbuch der Bestimmenden Mineralogie*. Wien: Braumüller and Seidel **1845**, 556-559 (In German).
  113. Kenngott, A. Tellur-glanze, in *Das Mohs'sche Mineralsystem, dem gegenwärtigen Standpunkte der Wissenschaft gemäss bearbeitet*. Wien **1853**, 121-122 (In German).
  114. Zhifu, S.; Keding, L.; Falan, T.; Jingyi, Z. Pingguite: a new bismuth tellurite mineral. *Acta Mineralogica Sinica* **1994**, *14*, 315.
  115. Spiridonov, E.M.; Tananaeva, O. Plumbotellurite, alpha-PbTeO<sub>3</sub>, a new mineral. *Doklady Akademii Nauk SSSR* **1982**, *262*(5), 1231-1235.
  116. Gaines, R.V. Poughite, a new tellurite mineral from Mexico and Honduras. *American Mineralogist* **1968**, *53*, 1075-1080
  117. Williams S.A. Quetzalcoatlite, Cu<sub>4</sub>Zn<sub>8</sub>(TeO<sub>3</sub>)<sub>3</sub>(OH)<sub>18</sub>, a new mineral from Moctezuma, Sonora. *Mineralogical Magazine* **1974**, *39*, 261-263
  118. Pekov, I.V.; Vlasov, E.A.; Zubkova, N.V.; Yapaskurt, V.O.; Chukanov, N.V.; Belakovskiy, D.I.; Lykova, I.S.; Apletalin, A.V.; Zolotarev, A.A.; Pushcharovsky, D.Y. Raisaite, CuMg[Te<sup>6+</sup>O<sub>4</sub>(OH)<sub>2</sub>].6H<sub>2</sub>O, a new mineral from Chukotka, Russia. *European Journal of Mineralogy* **2016**, *28*, 459-466.
  119. Williams, S.A. Rajite, naturally occurring cupric pyrotellurite, a new mineral. *Mineralogical Magazine* **1979**, *43*, 91-92.
  120. Ford W.E. Rickardite, a new mineral. *The American Journal of Science* **1903**, *165*, 69-70
  121. Sierra Lopez, J.; Leal, G.; Pierrot, R.; Laurent, Y.; Protas, J.; Dusaoy, Y. La rodalquilarite, chlorotellurite de fer, une nouvelle espèce minérale. *Bulletin de la Société Française de Minéralogie et de Cristallographie* **1968**, *91*, 28-33 (In French).
  122. Zav'yalov, E.N.; Begizov, V.D. Rucklidgeite, (Bi,Pb)<sub>3</sub>Te<sub>4</sub>, a new mineral from the Zod and Kochkar gold ore deposits. *Zapiski Vsesoyuznogo Mineralogicheskogo Obshchestva* **1977**, *106*(1), 62-68 (In Russian).
  123. Clarke, R.M. Saddlebackite, Pb<sub>2</sub>Bi<sub>2</sub>Te<sub>2</sub>S<sub>3</sub>, a new mineral species from the Boddington gold deposit, Western Australia. *Australian Journal of Mineralogy* **1997**, *3*, 119-124.
  124. Williams, S.A. Schieffelinite, a new lead tellurate-sulphate from Tombstone, Arizona, *Mineralogical Magazine* **1980**, *43*, 771-773
  125. Gaines, R.V. Schmitterite—a new uranyl tellurite from Moctezuma, Sonora. *American Mineralogist* **1971**, *56*, 411-415
  126. Zuxiang, Y. Shuangfengite, a new iridium bitelluride. *Acta Mineralogica Sinica* **1994**, *14*, 322-326.

- 
127. Johan, Z.; Picot, P.; Ruhlmann, F. The ore mineralogy of the Otish Mountains uranium deposit, Quebec; skippenite,  $\text{Bi}_2\text{Se}_2\text{Te}$ , and watkinsonite,  $\text{Cu}_2\text{PbBi}_4(\text{Se,S})_8$ , two new mineral species. *The Canadian Mineralogist* **1987**, *25*, 625-638.
128. Spiridonov, E.M.; Demina, L. Smirnite,  $\text{Bi}_2\text{TeO}_5$ , a new mineral. *Doklady Akademii Nauk SSSR* **1984**, *278*(1), 199-202 (In Russian).
129. Gaines, R.V.; Donnay, G.; Hey, M.H. Sonoraite. *American Mineralogist* **1968**, *53*, 1828-1832.
130. Orsoev, D.A.; Rezhnova, S.A.; Bodanova, A.N. Sopcheite,  $\text{Ag}_4\text{Pd}_3\text{Te}_4$ , a new mineral from copper-nickel ores of the Monchegorsk pluton. *Zapiski Vsesoyuznogo Mineralogicheskogo Obshchestva* **1982**, *111*(1), 114-117
131. Morana, M.; Bindi, L. Spiridonovite,  $(\text{Cu}_{1-x}\text{Ag}_x)_2\text{Te}$  ( $x \approx 0.4$ ), a New Telluride from the Good Hope Mine, Vulcan, Colorado (USA). *Minerals* **2019**, *9*, 194.
132. Mandarino, J.A. Spiroffite, a new tellurite mineral from Mexico. *American Mineralogist* **1962**, *47*, 196-196
133. Schrauf, A. Ueber die Tellurerze Siebenbürgens. *Zeitschrift für Kristallographie und Mineralogie* **1878**, *2*, 209-252.
134. Zav'yalov, E.N.; Begizov, V.D. Sulphotsumoite,  $\text{Bi}_3\text{Te}_2\text{S}$ , a new bismuth mineral. *Zapiski Vsesoyuznogo Mineralogicheskogo Obshchestva* **1982**, *111*(3), 316-320 (In Russian).
135. Beudant, F.S. Sylvane. In *Traité Élémentaire de Minéralogie*, 2<sup>nd</sup> Ed. (Paris) **1832**, 542-543.
136. Yosimura, T. Teineite, a new tellurate mineral from the Teine mine, Hokkaidō, Japan. *Journal of the Faculty of Science, Hokkaido Imperial University, Series IV, Geology and Mineralogy* **1939**, 465-470
137. Kovalenker, V.A.; Genkin, A.D.; Evstigneeva, T.L.; Laputina, I.P. Telargpalite, a new mineral of palladium, silver and tellurium, from the copper-nickel ores of the Oktyabr deposit. *Zapiski Vsesoyuznogo Mineralogicheskogo Obshchestva* **1974**, *103*(5), 595-600 (In Russian).
138. Haidinger, W. Zweite Klasse: Geogenide. II. Ordnung. Baryte. VIII. Antimonbaryt. Tellurit. In *Handbuch der Bestimmenden Mineralogie*. Wien: Braumüller and Seidel **1845**, 499-506 (In German).
139. Klaproth, M.H. Chemische Untersuchung der Siebenbürgischen Golderze. *Beiträge zur Chemischen Kenntniss der Mineralkörper* **1802**, *3*, 1-34 (In German).
140. Balch, D.M.; Jackson C.T. On tellurbismuth from Dahlonega, Georgia. *The American Journal of Science and Arts* **1863**, *85*, 99-101.
141. Gait, R.I.; Harris, D.C. Arsenohauchecornite and tellurohauchecornite: new minerals in the hauchecornite group. *Mineralogical Magazine* **1980**, *43*, 877-878.
142. Back, M.E.; Grice, J.D.; Gault, R.A.; Cooper, M.A.; Walford, P.C.; Mandarino, J.A. Telluromandarinoite, a new tellurite mineral from the El Indio-Tambo mining property, Andes Mountains, Chile. *The Canadian Mineralogist* **2017**, *55*, 21-28.
143. Řídkošil, T.; Skála, R.; Johan, Z.; Šrein, V. Telluronevskite,  $\text{Bi}_3\text{TeSe}_2$ , a new mineral. *European Journal of Mineralogy* **2001**, *13*, 177-185.
144. Kampf, A.R.; Mills, S.J.; Housley, R.M., Marty, J.; Thorne, B. Lead-tellurium oxysalts from Otto Mountain near Baker, California: VI. Telluroperite,  $\text{Pb}_3\text{Te}^{4+}\text{O}_4\text{Cl}_2$ , the Te analog of perite and nadorite. *American Mineralogist* **2010**, *95*, 1569-1573.
145. Cabri, L.J.; Laflamme, J.G.; Stewart, J.M. Temagamite, a new palladium-mercury telluride from the Temagami copper deposit, Ontario, Canada. *The Canadian Mineralogist* **1973**, *12*, 193-198.
146. Haidinger, W. Notiz über den rhomboëdrischen Wismuthglanz, *Zeitschrift für Physik und Mathematik* **1831**, *9*, 129-132 (In German).
147. Guowu, L.; Yuan, X.; Ming, X. Tewite: a K-Te-W new mineral species with a modified tungsten-bronze type structure, from the Panzhihua-Xichang region, southwest China. *European Journal of Mineralogy* **2019**, *31*, 145-152.
148. Kampf, A.R.; Housley, R.M.; Marty, J. Lead-tellurium oxysalts from Otto Mountain near Baker, California: III. Thorneite,  $\text{Pb}_6(\text{Te}^{6+}_2\text{O}_{10})(\text{CO}_3)\text{Cl}_2(\text{H}_2\text{O})$ , the first mineral with edge-sharing octahedral tellurate dimers. *American Mineralogist* **2010**, *95*, 1548-1553.
149. Williams, S.A. Xocomecatlite,  $\text{Cu}_3\text{TeO}_4(\text{OH})_4$ , and tlalocite,  $\text{Cu}_{10}\text{Zn}_6(\text{TeO}_3)(\text{TeO}_4)_2\text{Cl}(\text{OH})_{25}\cdot 27\text{H}_2\text{O}$ , two new minerals from Moctezuma, Sonora, Mexico. *Mineralogical Magazine* **1975**, *40*, 221-226.
150. Williams, S.A.; Duggan, M. Tlapallite, a new mineral from Moctezuma, Sonora, Mexico. *Mineralogical Magazine* **1978**, *42*, 183-186.
151. Kojonen, K.K.; McDonald, A.M.; Stanley, C.J.; Johanson, B. Törnroosite,  $\text{Pd}_{11}\text{As}_2\text{Te}_2$ , a new mineral species related to isomertieite from Miessijoki, Finnish Lapland, Finland. *The Canadian Mineralogist* **2011**, *49*, 1643-1651.

- 
152. Sandomirskaya, S.M.; Arifulov, C.K.; Botova, M.M.; Mozgova, N.N.; Nenasheva, S.N.; Tsepin, A.I.; Sivtsov, A.V. Tsnigriite  $\text{Ag}_9\text{SbTe}_3(\text{S,Se})_3$  — a new mineral. *Zapiski Vserossijskogo Mineralogicheskogo Obshchestva* **1992**, *121*(5), 95-101 (In Russian).
  153. Shimazaki, H.; Ozawa, T. Tsumoite,  $\text{BiTe}$ , new mineral from the Tsumo Mine, Japan. *American Mineralogist* **1978**, *63*, 1162-1165.
  154. Roberts, A.C.; Stirling, J.A.; Criddle, A.J.; Jensen, M.C. Utahite, a new mineral and associated copper tellurates from the Centennial Eureka Mine, Tintic District, Juab County, Utah. *Mineralogical Record* **1997**, *28*, 175-179.
  155. Laufek, F.; Drábek, M.; Skála, R.; Haloda, J.; Táborský, Z.; Císařová, I. Vavřinite,  $\text{Ni}_2\text{SbTe}$ , a new mineral species from the Kunratice Cu–Ni sulfide deposit, Czech Republic. *The Canadian Mineralogist* **2007**, *45*, 1213-1219.
  156. Skála, R.; Ondruš, P.; Veselovský, F.; Táborský, Z.; Důda, R. Vihorlatite,  $\text{Bi}_{24}\text{Se}_{17}\text{Te}_4$ , a new mineral of the tetradymite group from Vihorlat Mts., Slovakia. *European Journal of Mineralogy* **2007**, *19*, 255-265.
  157. Bezmertnaya, M.S.; Soboleva, L.N. Volynskite, a new telluride of bismuth and silver. *USSR Acad. Sci. Experimental Methodologies and Studies of Ore Minerals* **1965**, 129-141 (In Russian).
  158. Cameron, E.N.; Threadgold I.M. Vulcanite, a new copper telluride from Colorado, with notes on certain associated minerals. *American Mineralogist* **1961**, *46*, 258-268.
  159. Back, M.E.; Grice, J.D.; Gault, R.A.; Criddle, A.J.; Mandarino, J.A. Walfordite, a new tellurite species from the Wendy open pit, El Indio-Tambo mining property, Chile. *The Canadian Mineralogist* **1999**, *37*, 1261-1268.
  160. Crawford, W.P. Weissite - a new mineral. *American Journal of Science* **1927**, *13*, 345-346.
  161. Grundler, P.V.; Brugger, J.; Meisser, N.; Ansermet, S.; Borg, S.; Etschmann, B.; Testemale, D.; Bolin, T. Xocolatlite,  $\text{Ca}_2\text{Mn}^{4+}_2\text{Te}_2\text{O}_{12}\cdot\text{H}_2\text{O}$ , a new tellurate related to kuranakhite: description and measurement of Te oxidation state by XANES spectroscopy. *American Mineralogist* **2008**, *93*, 1911-1920.
  162. Kim, A.A.; Zayakina, N.V.; Lavrent'yev, Y.G. Yafsoanite,  $(\text{Zn}_{1.38}\text{Ca}_{1.36}\text{Pb}_{0.26})_3\text{TeO}_6$ , a new tellurium mineral. *Zapiski Vsesoyuznogo Mineralogicheskogo Obshchestva* **1982**, *111*(1), 118-121
  163. Williams, S.A.; Cesbron, F.P. Yecoraite  $\text{Fe}_3\text{Bi}_5(\text{TeO}_3)(\text{TeO}_4)_2\text{O}_9\cdot n\text{H}_2\text{O}$  a new mineral from Sonora, Mexico. *Boletín de Mineralogía* **1985**, *1*, 10-16.
  164. Mandarino, J.A.; Matzat, E.; Williams, S.J. Zemannite, a new tellurite mineral from Moctezum, Sonora, Mexico. *The Canadian Mineralogist* **1969**, *10*, 139-140
  165. Zhang, P.-H.; Zhu, J.-C.; Zhao, Z.-H.; Gu, X.-P.; Lin, J.-F. Zincospiroffite, a new tellurite mineral species from the Zhongshangou Gold Deposit, Hebei Province, People's Republic of China. *The Canadian Mineralogist* **2004**, *42*, 763-768.

Table S2. Classification of mineral systems of tellurium minerals according to number of species-defining elements ( $N$ ) and chemical composition.

| $N$                         | System     | Mineral                                          | Chemical formula                 |
|-----------------------------|------------|--------------------------------------------------|----------------------------------|
| <b>Native elements</b>      |            |                                                  |                                  |
| 1                           | Te         | Tellurium                                        | Te                               |
| <b>Oxides</b>               |            |                                                  |                                  |
| 2                           | OTe        | Paratellurite                                    | TeO <sub>2</sub>                 |
|                             |            | Tellurite                                        | TeO <sub>2</sub>                 |
| <b>Tellurides</b>           |            |                                                  |                                  |
| <i>I. Simple tellurides</i> |            |                                                  |                                  |
|                             | TeAs       | Kalgoorlieite                                    | As <sub>2</sub> Te <sub>3</sub>  |
|                             | TeSb       | Tellurantimony                                   | Sb <sub>2</sub> Te <sub>3</sub>  |
|                             | TeBi       | Tsumoite                                         | BiTe                             |
|                             |            | Tellurobismuthite                                | Bi <sub>2</sub> Te <sub>3</sub>  |
|                             |            | Pilsenite                                        | Bi <sub>4</sub> Te <sub>3</sub>  |
|                             |            | Hedleyite                                        | Bi <sub>7</sub> Te <sub>3</sub>  |
|                             | TePb       | Altaite                                          | PbTe                             |
|                             | TeFe       | Frohbergite                                      | FeTe <sub>2</sub>                |
|                             | TeCo       | Mattagamite                                      | CoTe <sub>2</sub>                |
|                             | TeNi       | Melonite                                         | NiTe <sub>2</sub>                |
| 2                           | TePd       | Merenskyite                                      | PdTe <sub>2</sub>                |
|                             |            | Kotulskite                                       | PdTe                             |
|                             |            | Telargpalite                                     | Pd <sub>3</sub> Te               |
|                             |            | Telluropalladinite                               | Pd <sub>9</sub> Te <sub>4</sub>  |
|                             |            | Keithconnite                                     | Pd <sub>20</sub> Te <sub>7</sub> |
|                             | TeIr       | Shuangfengite                                    | IrTe <sub>2</sub>                |
|                             |            | Gaotaiite                                        | Ir <sub>3</sub> Te <sub>8</sub>  |
|                             | TePt       | Moncheite                                        | PtTe <sub>2</sub>                |
|                             |            | Mitrofanovite                                    | Pt <sub>3</sub> Te <sub>4</sub>  |
|                             | TeCu       | Vulcanite                                        | CuTe                             |
| Weissite                    |            | Cu <sub>2-x</sub> Te                             |                                  |
| Rickardite                  |            | Cu <sub>3-x</sub> Te <sub>2</sub>                |                                  |
| Cameronite                  |            | Cu <sub>5</sub> Cu <sub>3</sub> Te <sub>10</sub> |                                  |
| Spiridonovite               |            | Cu <sub>2</sub> Te                               |                                  |
| TeAg                        | Empressite | AgTe                                             |                                  |
|                             | Hessite    | Ag <sub>2</sub> Te                               |                                  |
|                             | Stützite   | Ag <sub>5</sub> Te <sub>3</sub>                  |                                  |
|                             | Lingbaoite | AgTe <sub>3</sub>                                |                                  |
| TeAu                        | Calaverite | AuTe <sub>2</sub>                                |                                  |

|   |            |                   |                                        |
|---|------------|-------------------|----------------------------------------|
|   |            | Montbrayite       | $\text{Au}_2\text{Te}_3$               |
|   | TeHg       | Coloradoite       | HgTe                                   |
|   | TeAsPd     | Törnroosite       | $\text{Pd}_{11}\text{As}_2\text{Te}_2$ |
|   | TeSbNi     | Vavřínite         | $\text{Ni}_2\text{SbTe}_2$             |
|   | TeSbPd     | Borovskite        | $\text{Pd}_3\text{SbTe}_4$             |
|   | TeSbAu     | Pampaloite        | $\text{AuSbTe}$                        |
|   | TeBiPb     | Rucklidgeite      | $\text{PbBi}_2\text{Te}_4$             |
|   |            | Kochkarite        | $\text{PbBi}_4\text{Te}_7$             |
|   | TeBiNi     | Ognitite          | $\text{NiBiTe}$                        |
|   | TeBiPd     | Michenerite       | $\text{PdBiTe}$                        |
|   | TeBiIr     | Mayingite         | $\text{IrBiTe}$                        |
|   | TeBiPt     | Maslovite         | $\text{PtBiTe}$                        |
|   | TeBiAg     | Volynskite        | $\text{AgBiTe}_2$                      |
|   | TeSnPd     | Kojonenite        | $\text{Pd}_6\text{SnTe}_2$             |
| 3 | TePbPd     | Pašavaite         | $\text{Pd}_3\text{Pb}_2\text{Te}_2$    |
|   | TeTlAu     | Honeaite          | $\text{Au}_3\text{TlTe}_2$             |
|   | TeNiPd     | Monchetundraite   | $\text{Pd}_2\text{NiTe}_2$             |
|   | TePdAg     | Lukkulaisvaaraite | $\text{Ag}_2\text{Pd}_{14}\text{Te}_9$ |
|   |            | Sopcheite         | $\text{Ag}_4\text{Pd}_3\text{Te}_4$    |
|   | TePdHg     | Temagamite        | $\text{Pd}_3\text{HgTe}_3$             |
|   | TeCuAg     | Henryite          | $\text{Cu}_4\text{Ag}_3\text{Te}_4$    |
|   | TeCuAu     | Kostovite         | $\text{AuCuTe}_4$                      |
|   |            | Bezsmertnovite    | $\text{Au}_4\text{CuTe}$               |
|   |            | Muthmannite       | $\text{AuAgTe}_2$                      |
|   | TeAgAu     | Petzite           | $\text{AuAg}_3\text{Te}_2$             |
|   |            | Sylvanite         | $\text{AuAgTe}_4$                      |
|   |            | Krennerite        | $\text{Au}_3\text{AgTe}_8$             |
| 4 | TePbCuAu   | Bilibinskite      | $\text{PbAu}_3\text{Cu}_2\text{Te}_2$  |
| 5 | TeSbPbAgHg | Mazzettiite       | $\text{Ag}_3\text{HgPbSbTe}_5$         |

## II. Sulphido-tellurides

|   |         |                |                                               |
|---|---------|----------------|-----------------------------------------------|
|   |         | Ingodite       | $\text{Bi}_2\text{TeS}$                       |
|   | STeBi   | Tetradymite    | $\text{Bi}_2\text{Te}_2\text{S}$              |
|   |         | Sulphotsumoite | $\text{Bi}_3\text{Te}_2\text{S}$              |
| 3 |         | Baksanite      | $\text{Bi}_6\text{Te}_2\text{S}_3$            |
|   | STePb   | Museumite      | $\text{Pb}_2\text{Pb}_2\text{S}_8\text{Te}_2$ |
|   | STeCu   | Goldfieldite   | $\text{Cu}_{10}\text{Te}_4\text{S}_{13}$      |
|   | STeAg   | Cervelleite    | $\text{Ag}_4\text{TeS}$                       |
| 4 | STeSbAg | Tsnigriite     | $\text{Ag}_9\text{SbTe}_3\text{S}_3$          |
|   | STeBiPb | Aleksite       | $\text{PbBi}_2\text{Te}_2\text{S}_2$          |

|                                 |           |                      |                                                                 |
|---------------------------------|-----------|----------------------|-----------------------------------------------------------------|
|                                 |           | Saddlebackite        | $\text{Pb}_2\text{Bi}_2\text{Te}_2\text{S}_3$                   |
|                                 |           | Hitachiite           | $\text{Pb}_5\text{Bi}_2\text{Te}_2\text{S}_6$                   |
|                                 | STeBiNi   | Tellurohauchecornite | $\text{Ni}_9\text{BiTeS}_8$                                     |
|                                 | STeGeAg   | Alburnite            | $\text{Ag}_8\text{GeTe}_2\text{S}_4$                            |
|                                 | STeFeAg   | Chenguodaite         | $\text{Ag}_9\text{FeTe}_2\text{S}_4$                            |
|                                 | STeAsAgHg | Debattistiite        | $\text{Ag}_9\text{Hg}_{0.5}\text{As}_6\text{S}_{12}\text{Te}_2$ |
| 5                               | STeSbCuAg | Benleonardite        | $\text{Ag}_{15}\text{CuSb}_2\text{S}_7\text{Te}_4$              |
|                                 | STeBiPbAu | Buckhornite          | $\text{Pb}_2\text{AuBiTe}_2\text{S}_3$                          |
|                                 | STeSnPdCu | Oulankaite           | $\text{Pd}_5\text{Cu}_4\text{SnTe}_2\text{S}_2$                 |
| <b>III. Selenido-tellurides</b> |           |                      |                                                                 |
|                                 |           | Kawazulite           | $\text{Bi}_2\text{Te}_2\text{Se}$                               |
|                                 | SeTeBi    | Skippenite           | $\text{Bi}_2\text{Se}_2\text{Te}$                               |
|                                 |           | Telluronevskite      | $\text{Bi}_3\text{TeSe}_2$                                      |
|                                 |           | Vihorlatite          | $\text{Bi}_{24}\text{Se}_{17}\text{Te}_4$                       |
| 3                               |           | SeTeNi               | Kitkaite                                                        |
|                                 | SeTePd    | Miessiite            | $\text{Pd}_{11}\text{Te}_2\text{Se}_2$                          |
|                                 | SeTeAg    | Kurilite             | $\text{Ag}_8\text{Te}_3\text{Se}$                               |
|                                 | SeTeAu    | Maletoyvayamite      | $\text{Au}_3\text{Se}_4\text{Te}_6$                             |
| <b>IV. Chlorido-tellurides</b>  |           |                      |                                                                 |
| 3                               | ClTePb    | Kolarite             | $\text{PbTeCl}_2$                                               |
|                                 |           | Radhakrishnaite      | $\text{PbTe}_3\text{Cl}_2$                                      |
| <b>Tellurites</b>               |           |                      |                                                                 |
| <b>I. Anhydrous tellurites</b>  |           |                      |                                                                 |
|                                 | OTeBi     | Chekhovichite        | $\text{Bi}^{3+}_2\text{Te}^{4+}_4\text{O}_{11}$                 |
|                                 |           | Pingguite            | $\text{Bi}_6\text{Te}_2\text{O}_{13}$                           |
|                                 |           | Smirnite             | $\text{Bi}_2\text{TeO}_5$                                       |
|                                 | OTePb     | Fairbankite          | $\text{Pb}(\text{TeO}_3)$                                       |
|                                 |           | Plumbotellurite      | $\text{Pb}(\text{TeO}_3)$                                       |
|                                 | OTeTi     | Winstanleyite        | $\text{TiTe}_3\text{O}_8$                                       |
| 3                               | OTeMn     | Spiroffite           | $\text{Mn}_2\text{Te}_3\text{O}_8$                              |
|                                 | OTeCu     | Balyakinite          | $\text{Cu}(\text{TeO}_3)$                                       |
|                                 |           | Rajite               | $\text{CuTe}_2\text{O}_5$                                       |
|                                 | OTeZn     | Zincospiroffite      | $\text{Zn}_2\text{Te}_3\text{O}_8$                              |
|                                 | OTeHg     | Magnolite            | $\text{Hg}_2(\text{TeO}_3)$                                     |
|                                 | OTeU      | Cliffordite          | $\text{UTe}_3\text{O}_9$                                        |
|                                 |           | Schmitterite         | $(\text{UO}_2)(\text{TeO}_3)$                                   |
| 4                               | OCITePb   | Telluroperite        | $\text{Pb}_2(\text{TePb})_{\Sigma 2}\text{O}_4\text{Cl}_2$      |
|                                 | OSTeBi    | Bodieite             | $\text{Bi}_2(\text{TeO}_3)_2(\text{SO}_4)$                      |

|   |             |              |                                                                                 |
|---|-------------|--------------|---------------------------------------------------------------------------------|
|   | OSTePb      | Adanite      | $\text{Pb}_2(\text{TeO}_3)(\text{SO}_4)$                                        |
|   |             | Northstarite | $\text{Pb}_6(\text{Te}^{4+}\text{O}_3)_5(\text{S}^{6+}\text{O}_3\text{S}^{2-})$ |
|   | OTeCCa      | Mroseite     | $\text{CaTeO}_2(\text{CO}_3)$                                                   |
|   | OTeWK       | Tewite       | $\text{K}_4(\text{Te}_3\Box)_{\Sigma 4}\text{W}_{10}\text{O}_{38}$              |
|   | OTeMnCa     | Denningite   | $\text{CaMnTe}_4\text{O}_{10}$                                                  |
|   | OTeUPb      | Moctezumite  | $\text{Pb}(\text{UO}_2)(\text{TeO}_3)_2$                                        |
|   | OCISTePbFe  | Eztlite      | $\text{Pb}_2\text{Fe}_3(\text{TeO}_3)_3(\text{SO}_4)\text{O}_2\text{Cl}$        |
| 6 | OCISTeCuK   | Nabokoite    | $\text{Cu}_7\text{TeO}_4(\text{SO}_4)_5\cdot\text{KCl}$                         |
|   | OCITeSbPbCu | Choloalite   | $\text{Pb}_3(\text{Cu}_2\text{Sb})_{\Sigma 3}\text{Te}_6\text{O}_{18}\text{Cl}$ |

## II. *Hydrous tellurites*

|   |            |                     |                                                                                                         |
|---|------------|---------------------|---------------------------------------------------------------------------------------------------------|
|   |            | Emmonsite           | $\text{Fe}_2(\text{TeO}_3)_3\cdot 2\text{H}_2\text{O}$                                                  |
|   |            | Mackayite           | $\text{FeTe}_2\text{O}_5(\text{OH})$                                                                    |
|   | OHTeFe     | Sonoraite           | $\text{Fe}(\text{TeO}_3)(\text{OH})\cdot\text{H}_2\text{O}$                                             |
| 4 |            | Telluromandarinoite | $\text{Fe}_2(\text{TeO}_3)_3\cdot 6\text{H}_2\text{O}$                                                  |
|   |            | Millsite            | $\text{CuTeO}_3\cdot 2\text{H}_2\text{O}$                                                               |
|   | OHTeCu     | Teineite            | $\text{Cu}(\text{TeO}_3)\cdot 2\text{H}_2\text{O}$                                                      |
|   |            | Graemite            | $\text{Cu}(\text{TeO}_3)\cdot\text{H}_2\text{O}$                                                        |
|   | OHCITeFe   | Rodalquilarite      | $\text{H}_3\text{Fe}_2(\text{TeO}_3)_4\text{Cl}$                                                        |
| 5 |            | Tamboite            | $\text{Fe}_3(\text{TeO}_3)_3[\text{TeO}(\text{OH})_2](\text{SO}_4)(\text{OH})\cdot 5\text{H}_2\text{O}$ |
|   | OHSTeFe    | Metatamboite        | $\text{Fe}_3(\text{TeO}_3)_3[\text{TeO}(\text{OH})_2](\text{SO}_4)(\text{OH})\cdot 3\text{H}_2\text{O}$ |
|   |            | Poughite            | $\text{Fe}_2(\text{TeO}_3)_2(\text{SO}_4)\cdot 3\text{H}_2\text{O}$                                     |
|   | OHCITeAsCu | Eurekadumpite       | $\text{Cu}_{16}(\text{TeO}_3)_2(\text{AsO}_4)_3\text{Cl}(\text{OH})_{18}\cdot 7\text{H}_2\text{O}$      |
|   | OHTeAsCuCa | Juabite             | $\text{CaCu}_{10}(\text{TeO}_3)_4(\text{AsO}_4)_4(\text{OH})_2\cdot 4\text{H}_2\text{O}$                |
| 6 | OHTeMnFeMg | Kinichilite         | $\text{MgMn}_2\text{Fe}_2(\text{TeO}_3)_6\cdot 9\text{H}_2\text{O}$                                     |
|   | OHTeMnZnMg | Iirneyite           | $\text{MgZn}_2\text{Mn}_2(\text{TeO}_3)_6\cdot 9\text{H}_2\text{O}$                                     |
|   | OHTeFeNiMg | Keystoneite         | $\text{MgNi}_2\text{Fe}_2(\text{TeO}_3)_6\cdot 9\text{H}_2\text{O}$                                     |
|   | OHTeFeZnMg | Zemannite           | $\text{MgZn}_2\text{Fe}_2(\text{TeO}_3)_6\cdot 9\text{H}_2\text{O}$                                     |

## Tellurates

### I. *Anhydrous tellurates*

|   |           |                 |                                                  |
|---|-----------|-----------------|--------------------------------------------------|
|   | OTePb     | Ottoite         | $\text{Pb}_2(\text{TeO}_5)$                      |
| 3 | OTeFe     | Andymcdonaldite | $\text{Fe}_2(\text{TeO}_6)$                      |
|   | OTeCu     | Mcalpineite     | $\text{Cu}_3(\text{TeO}_6)$                      |
|   | OTeZn     | Dagenaisite     | $\text{Zn}_3(\text{TeO}_6)$                      |
|   | OTeBiMo   | Chiluite        | $\text{Bi}_6\text{Te}_2\text{Mo}_2\text{O}_{21}$ |
| 4 | OTePbU    | Markcooperite   | $\text{Pb}_2(\text{UO}_2)(\text{TeO}_6)$         |
|   | OTeMnPb   | Kuranakhite     | $\text{PbMn}(\text{TeO}_6)$                      |
|   | OTeZnCa   | Yafsoanite      | $\text{Ca}_3\text{Zn}_3(\text{TeO}_6)_2$         |
| 5 | OCITePbAl | Backite         | $\text{Pb}_2\text{Al}(\text{TeO}_6)\text{Cl}$    |



|   |             |               |                                                                                           |
|---|-------------|---------------|-------------------------------------------------------------------------------------------|
|   | OCITePbFe   | Müllerite     | $\text{Pb}_2\text{Fe}(\text{TeO}_6)\text{Cl}$                                             |
|   | OTeAsPbZn   | Dugganite     | $\text{Pb}_3\text{Zn}_3(\text{TeO}_6)(\text{AsO}_4)_2$                                    |
|   | OTePPbZn    | Kuksite       | $\text{Pb}_3\text{Zn}_3(\text{TeO}_6)(\text{PO}_4)_2$                                     |
|   | OTePbVZn    | Cheremnykhite | $\text{Pb}_3\text{Zn}_3(\text{TeO}_6)(\text{VO}_4)_2$                                     |
| 6 | OCITeCPbCu  | Hagstromite   | $\text{Pb}_8\text{Cu}(\text{TeO}_6)_2(\text{CO}_3)\text{Cl}_4$                            |
|   | OTeSiPbAlFe | Burckhardtite | $\text{Pb}_2(\text{Fe}^{3+}\text{Te}^{6+})_{\Sigma 2}(\text{AlSi}_3\text{O}_8)\text{O}_6$ |

## II. Hydrous tellurates

|   |            |                     |                                                                                                     |
|---|------------|---------------------|-----------------------------------------------------------------------------------------------------|
|   | OHTeBi     | Montanite           | $\text{Bi}_2(\text{TeO}_6) \cdot 2\text{H}_2\text{O}$                                               |
|   | OHTeFe     | Cuzticite           | $\text{Fe}_2(\text{TeO}_6) \cdot 3\text{H}_2\text{O}$                                               |
| 4 |            | Brumadoite          | $\text{Cu}_3(\text{TeO}_4)(\text{OH})_4 \cdot 5\text{H}_2\text{O}$                                  |
|   |            | Cesbronite          | $\text{Cu}_3(\text{TeO}_4)(\text{OH})_4$                                                            |
|   | OHTeCu     | Frankhawthorneite   | $\text{Cu}_2(\text{TeO}_4)(\text{OH})_2$                                                            |
|   |            | Jensenite           | $\text{Cu}_3(\text{TeO}_6) \cdot 2\text{H}_2\text{O}$                                               |
|   |            | Xocomecatlite       | $\text{Cu}_3(\text{TeO}_4)(\text{OH})_4$                                                            |
|   | OHCITeCu   | Mojaveite           | $\text{Cu}_6[\text{TeO}_4(\text{OH})_2](\text{OH})_7\text{Cl}$                                      |
|   | OHSTePb    | Schieffelinite      | $\text{Pb}_{10}\text{Te}_6\text{O}_{20}(\text{OH})_{14}(\text{SO}_4) \cdot 5\text{H}_2\text{O}$     |
|   | OHTePbCr   | Chromschieffelinite | $\text{Pb}_{10}\text{Te}_6\text{O}_{20}(\text{OH})_{14}(\text{CrO}_4) \cdot 5\text{H}_2\text{O}$    |
|   |            | Andychristyite      | $\text{PbCuTeO}_5 \cdot \text{H}_2\text{O}$                                                         |
|   |            | Housleyite          | $\text{Pb}_6\text{CuTe}_4\text{O}_{18}(\text{OH})_2$                                                |
|   | OHTePbCu   | Khinite             | $\text{Cu}_3\text{Pb}(\text{TeO}_6)(\text{OH})_2$                                                   |
|   |            | Paratimroseite      | $\text{Pb}_2\text{Cu}_4(\text{TeO}_6)_2 \cdot 2\text{H}_2\text{O}$                                  |
| 5 |            | Timroseite          | $\text{Pb}_2\text{Cu}_5(\text{TeO}_6)_2(\text{OH})_2$                                               |
|   | OHTeMnCa   | Xocolatlite         | $\text{Ca}_2\text{Mn}_2\text{Te}_2\text{O}_{12} \cdot \text{H}_2\text{O}$                           |
|   | OHTeCuZn   | Utahite             | $\text{Cu}_5\text{Zn}_3(\text{TeO}_4)_4(\text{OH})_8 \cdot 7\text{H}_2\text{O}$                     |
|   |            | Quetzalcoatlite     | $\text{Cu}_4\text{Zn}_8(\text{TeO}_3)_3(\text{OH})_{18}$                                            |
|   |            | Leisingite          | $\text{CuMg}_2(\text{TeO}_6) \cdot 6\text{H}_2\text{O}$                                             |
|   | OHTeCuMg   | Pararaisaite        | $\text{CuMg}[\text{TeO}_4(\text{OH})_2] \cdot 6\text{H}_2\text{O}$                                  |
|   |            | Raisaite            | $\text{CuMg}[\text{TeO}_4(\text{OH})_2] \cdot 6\text{H}_2\text{O}$                                  |
|   | OHTeCuCa   | Eckhardite          | $\text{CaCuTeO}_5 \cdot \text{H}_2\text{O}$                                                         |
|   | OHCITeCPb  | Thorneite           | $\text{Pb}_6(\text{Te}_2\text{O}_{10})(\text{CO}_3)\text{Cl}_2 \cdot \text{H}_2\text{O}$            |
| 6 | OHCITePbCu | Fuettererite        | $\text{Pb}_3\text{Cu}_6(\text{TeO}_6)(\text{OH})_7\text{Cl}_5$                                      |
|   | OHSTePbCu  | Bairdite            | $\text{Pb}_2\text{Cu}_4\text{Te}_2\text{O}_{10}(\text{OH})_2(\text{SO}_4) \cdot \text{H}_2\text{O}$ |
|   | OHTeCPbCu  | Agaitite            | $\text{Pb}_3\text{CuTeO}_5(\text{OH})_2(\text{CO}_3)$                                               |

## Tellurito-tellurates

### I. Anhydrous tellurito-tellurates

|   |       |              |                                                                            |
|---|-------|--------------|----------------------------------------------------------------------------|
| 3 | OTeCa | Carlfriesite | $\text{CaTe}(\text{Te}^{4+})_2\text{O}_8$                                  |
|   | OTeFe | Walfordite   | $(\text{Fe}^{3+}_2\text{Te}^{6+})_{\Sigma 3}\text{Te}^{4+}_9\text{O}_{24}$ |

### II. Hydrous tellurito-tellurates

---

|   |            |            |                                                                                                                                       |
|---|------------|------------|---------------------------------------------------------------------------------------------------------------------------------------|
| 5 | OHTeBiFe   | Yecoraite  | $\text{Fe}_3\text{Bi}_5\text{O}_9(\text{Te}^{4+}\text{O}_3)(\text{Te}^{6+}\text{O}_4)_2 \cdot 9\text{H}_2\text{O}$                    |
| 6 | OHCITeCuZn | Tlalocite  | $\text{Cu}_{10}\text{Zn}_6(\text{Te}^{4+}\text{O}_3)(\text{Te}^{6+}\text{O}_4)_2\text{Cl}(\text{OH})_{25} \cdot 27\text{H}_2\text{O}$ |
|   | OHSTeCuCa  | Tlapallite | $\text{H}_6\text{Ca}_2\text{Cu}_3\text{O}_2(\text{SO}_4)(\text{Te}^{4+}\text{O}_3)_4(\text{Te}^{6+}\text{O}_4)$                       |

---
